# Supplementary material
Source: PubMed Central journal article supplement (PMC2947197)
Supplement: NIHMS233498-supplement-Supplementary_data.pdf [file NIHMS233498-supplement-Supplementary_data.pdf]

**SUPPLEMENTAL DATA**

This material is an online-only supplement to the following article: Shetty V, [Mooney LJ](#), [Zigler CM](#), [Belin TR](#), [Murphy D](#), [Rawson R](#). The relationship between methamphetamine use and increased dental disease. JADA 2010;141(3):307-318. Copyright © 2010 American Dental Association. All rights reserved.

**Table 6**

**Factors significantly relating to presence of dental conditions as determined by logistic regressions controlling for background characteristics, in odds ratios with 95 percent confidence intervals.**

| DENTAL CONDITION                                                    | MAIN EFFECTS               |                            |                            |                            |                            |                              | INTERACTIONS           |                 |                            |                  |                   |
|---------------------------------------------------------------------|----------------------------|----------------------------|----------------------------|----------------------------|----------------------------|------------------------------|------------------------|-----------------|----------------------------|------------------|-------------------|
|                                                                     | Female*                    | Age                        | Route of Administration†‡  |                            | Lifetime Years of Use§     | Days of Use in Past 30 Days¶ | Female × Lifetime Use# |                 | Age × Route**              |                  |                   |
|                                                                     |                            |                            | Intravenous                | Intranasal                 |                            |                              | Men                    | Women           | Intravenous                | Intranasal       | Smoking           |
| <b>As Reported by Participant</b>                                   |                            |                            |                            |                            |                            |                              |                        |                 |                            |                  |                   |
| <b>Toothache (n = 212)</b>                                          | 1.54 (0.9, 2.62)           | 1.04 (0.99, 1.08)          | 1.08 (0.56,2.1)            | 0.59 (0.29,1.21)           | 0.95 (0.74,1.21)           | <b>1.43 (0.99, 2.07)††</b>   |                        |                 |                            |                  |                   |
| <b>Swollen, inflamed and/or bleeding gums (n = 102)</b>             | 0.96 (0.57, 1.6)           | 1.02 (0.98,1.07)           | 1.49 (0.8,2.76)            | 1.35 (0.67,2.7)            | 1.15 (0.92,1.43)           | 0.94 (0.7, 1.27)             |                        |                 |                            |                  |                   |
| <b>Broken or loose teeth (n = 159)</b>                              | 0.74 (0.45,1.21)           | <b>1.05 (1, 1.09)‡‡</b>    | 1.6 (0.87, 2.94)           | 1.02 (0.51,2)              | 0.88 (0.7, 1.09)           | 1.26 (0.94, 1.69)            |                        |                 |                            |                  |                   |
| <b>Problems with cap, restoration, or other prosthesis (n = 81)</b> | 1.42 (0.8, 2.5)            | 1.03 (0.98, 1.08)          | 1.66 (0.86, 3.21)          | 1.04 (0.48, 2.23)          |                            | 1.02 (0.99, 1.05)            | 0.86 (0.61, 1.22)      | 1.36 (0.8, 2.2) |                            |                  |                   |
| <b>Cosmetic problems (n = 115)</b>                                  | 1.2 (0.72, 2.0)            |                            | <b>1.88 (1.02, 3.47)‡‡</b> | <b>2.44 (1.06, 5.62)‡‡</b> | 0.99 (0.95, 1.04)          | 1.01 (0.98, 1.04)            |                        |                 | <b>1.06 (0.99, 1.14)††</b> | 0.91 (0.8, 1.04) | 1.04 (0.99, 1.08) |
| <b>Temporomandibular joint disorders (n = 39)</b>                   | <b>3.43 (1.44, 8.2)‡‡</b>  | 1 (0.95, 1.06)             | 0.97 (0.4, 2.37)           | 1.29 (0.5, 3.34)           | 1.06 (0.78,1.44)           | 1.15 (0.77, 1.71)            |                        |                 |                            |                  |                   |
| <b>Tooth grinding/enamel erosion (n = 92)</b>                       | 1.43 (0.84, 2.45)          | 0.98 (0.94, 1.03)          | 1.49 (0.79,2.79)           | 1.36 (0.66,2.79)           | <b>1.23 (0.97, 1.56)††</b> | 1.13 (0.84, 1.52)            |                        |                 |                            |                  |                   |
| <b>Any dental condition (n = 268)</b>                               | 1.02 (0.47,2.22)           | 1.02 (0.95, 1.08)          | 1.28 (0.48, 3.41)          | 1.21 (0.38, 3.82)          | 0.99 (0.7, 1.4)            | 1.27 (0.75, 2.17)            |                        |                 |                            |                  |                   |
| <b>As Assessed by Physician</b>                                     |                            |                            |                            |                            |                            |                              |                        |                 |                            |                  |                   |
| <b>Abnormal mouth condition (n = 13)</b>                            | <b>0.27 (0.08, 0.95)‡‡</b> | 1.08 (0.98, 1.2)           | 0.83 (0.16,4.31)           | 2.07 (0.56, 7.63)          | 0.88 (0.54,1.42)           | 0.98 (0.52, 1.87)            |                        |                 |                            |                  |                   |
| <b>Abnormal dental condition (n = 93)</b>                           | <b>0.45 (0.26,0.77)‡‡</b>  | <b>1.07 (1.02, 1.12)‡‡</b> | 1.72 (0.9,3.31)            | 1.03 (0.49, 2.14)          | 0.94 (0.75, 1.19)          | 1.2 (0.89, 1.62)             |                        |                 |                            |                  |                   |
| <b>Dentures (n = 40)</b>                                            | <b>2.22 (1.01, 4.88)‡‡</b> | <b>1.06 (0.99, 1.12)††</b> | 0.79 (0.31,2.01)           | 1.48 (0.6, 3.63)           | <b>1.28 (0.96, 1.72)††</b> | 0.82 (0.52,1.28)             |                        |                 |                            |                  |                   |
| <b>Missing teeth (n = 180)</b>                                      | 1.28 (0.76, 2.18)          | <b>1.08 (1.04, 1.13)‡‡</b> | <b>2.47 (1.26, 4.83)‡‡</b> | 1.31 (0.63,2.73)           | 1.03 (0.81, 1.3)           | <b>1.42 (1.02,1.99)‡‡</b>    |                        |                 |                            |                  |                   |

\* In the model with the Female × Lifetime Use interaction, this odds ratio is reported for the average value of lifetime methamphetamine use (16.2 years).

† Compared with smoking.

‡ In the model with the Age × Route interaction, these odds ratios are reported for the average value of age (36.5 years).

§ Odds ratios are for an additional five years of use.

¶ Odds ratios are for an additional 10 days of use.

# These odds ratios are for an additional five years of use, given separately for men and women.

\*\* These odds ratios are for an additional year of age, given separately for intravenous, intranasal and smoking routes of administration.

†† Boldface type indicates statistical significance (α = .10).

‡‡ Boldface type indicates statistical significance (α = .05).

###
